# Supplementary material for: An updated assessment of Symbiodinium spp. that associate with common scleractinian corals from Moorea (French Polynesia) reveals high diversity among background symbionts and a novel finding of clade B
Source: PeerJ journal article supplement (doi:10.7717/peerj.2856), 2017-01-05

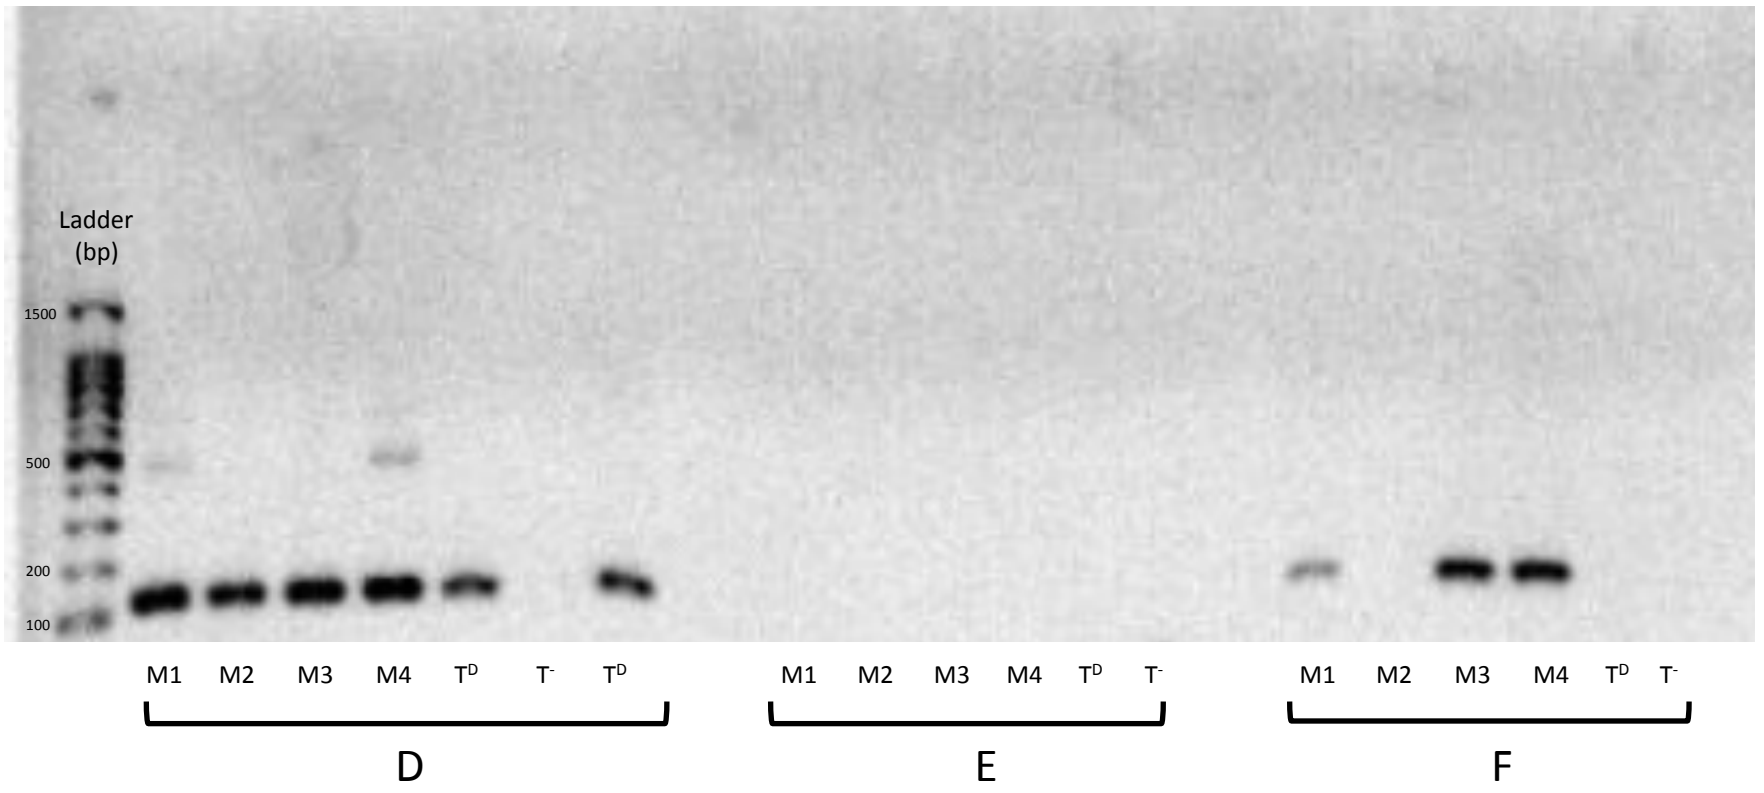

Supplement: Fig.S4.pdf [file Fig.S4.pdf]
